# Supplementary material for: Detection of influenza virus and Streptococcus pneumoniae in air sampled from co-infected ferrets and analysis of their influence on pathogen stability
Source: PubMed Central journal article supplement (PMC10449498; doi:10.1128/msphere.00039-23), 2023-05-31
Supplement: msphere.00039-23-s0002.pdf [file msphere.00039-23-s0002.pdf]

Supplemental Table 1. Average log decay for H1N1pdm09 or Spn in droplets

|           |                     | Log <sub>10</sub> Decay H1N1pdm09 ± SEM |                | Log <sub>10</sub> Decay Spn ± SEM |                |
|-----------|---------------------|-----------------------------------------|----------------|-----------------------------------|----------------|
| ASL Donor | HBE Donor Condition | H1N1pdm09                               | H1N1pdm09/Spn  | Spn                               | H1N1pdm09/Spn  |
| 223       | COPD                | 2.333 ± 0.068*                          | 1.667 ± 0.068* | 3.187 ± 0.067*                    | 2.565 ± 0.002* |
| 259       | COPD                | 1.083 ± 0.136                           | 1.125 ± 0.118  | 3.071 ± 0.101                     | 2.577 ± 0.033  |
| 284       | IPF                 | 0.958 ± 0.180                           | 1.292 ± 0.180  | 4.544 ± 0.248*                    | 2.848 ± 0.148* |
| 305       | COPD                | 1.00 ± 0.118                            | 0.708 ± 0.272  | 4.034 ± 0.167                     | 3.256 ± 0      |

An asterisk indicates FDR p-value <0.05 when comparing droplets of individual microbes to droplets with both microbes using Welch's unpaired t-tests with Benjamini-Hochberg correction for multiple comparisons.
